# Supplementary material
Source: MDPI journal article supplement (https://www.mdpi.com/2304-6740/11/6/233)
Supplement: s1 [file s1 › inorganics-2319504-supplementary.pdf]

# Supplementary Materials

## A Molecular Understanding over the Flame Retardant Mechanism of Zinc Stannate/Polypropylene Composites via ReaxFF Simulations

Jun Li<sup>1</sup>, Meilin Zhu<sup>2</sup>, Chang Geng<sup>3\*</sup>, Yingjie Yuan<sup>1</sup>, Zewei Fu<sup>1</sup>, Shu Yan<sup>3</sup>, Rou Feng<sup>3</sup>, Yingwu Wang<sup>4</sup>, Ying Zhou<sup>4</sup>, Liangliang Meng<sup>3</sup>, Hui Zhang<sup>3</sup>, and Hongcun Bai<sup>3\*</sup>

1. Yunnan Tin Industry Group (Holding) Co. Ltd. R & D Center, Kunming, 650200, China
  2. College of Basic Medical Sciences, Ningxia Medical University, Yinchuan 750004, China
  3. State Key Laboratory of High-Efficiency Utilization of Coal and Green Chemical Engineering, College of Chemistry and Chemical Engineering, Ningxia University, Yinchuan, Ningxia 750021, China
  4. Yunnan Provincial Academy of Science and Technology, No. 488 Dianchi Road, Kunming, Yunnan 650051, China
- \* Corresponding authors: C. Geng (Email: gengchang1111@163.com), H. Bai (E-mail: hongcunbai@nxu.edu.cn)

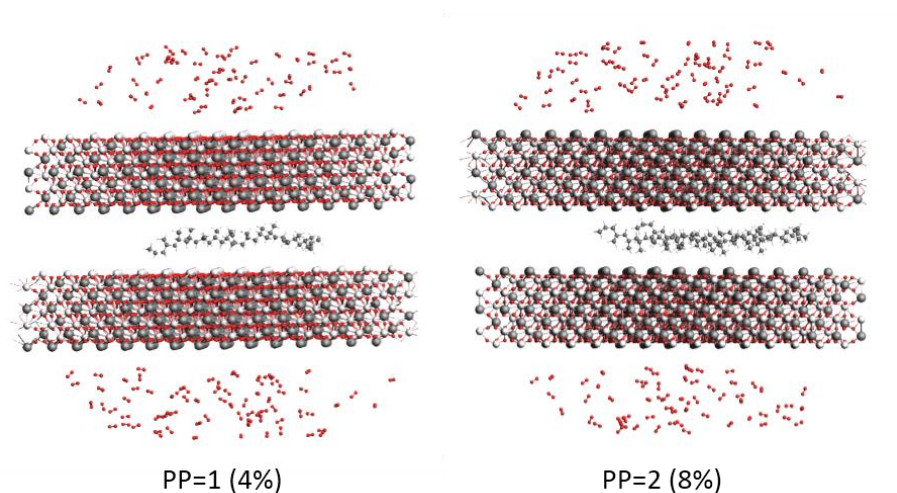

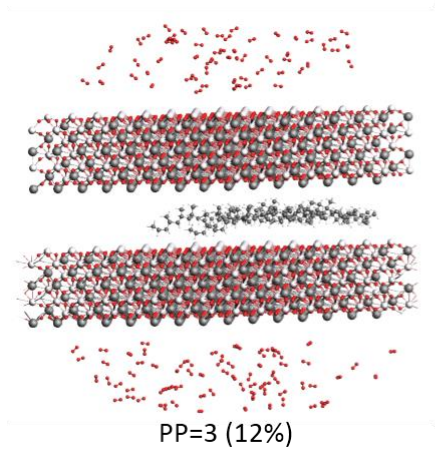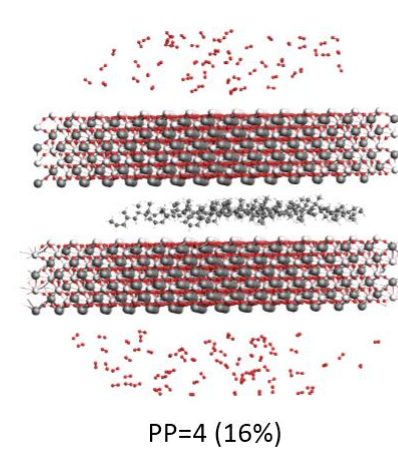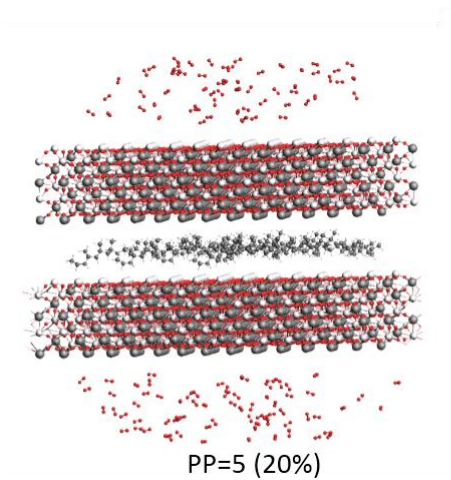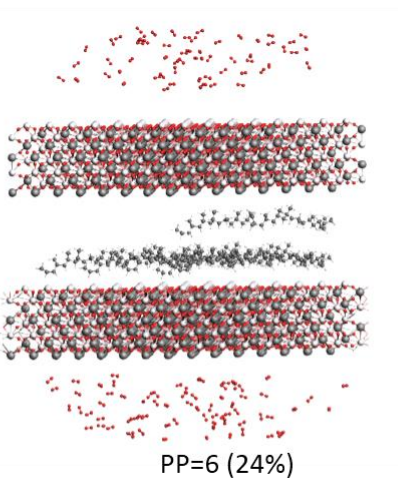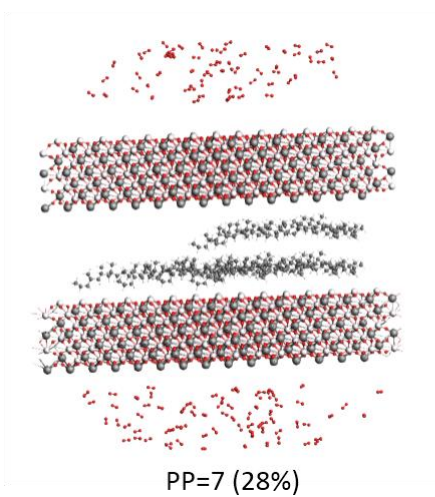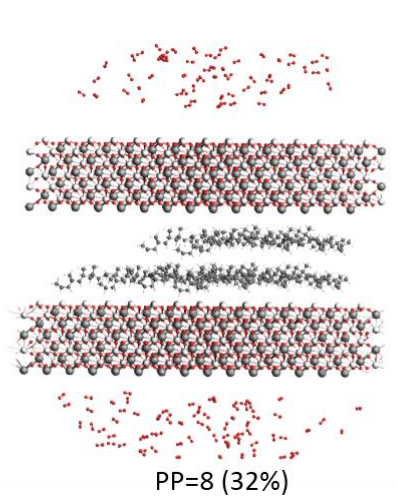

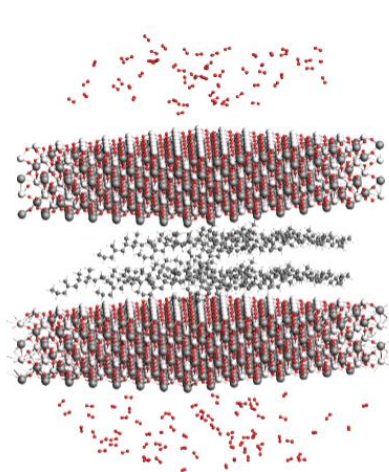

PP=9 (36%)

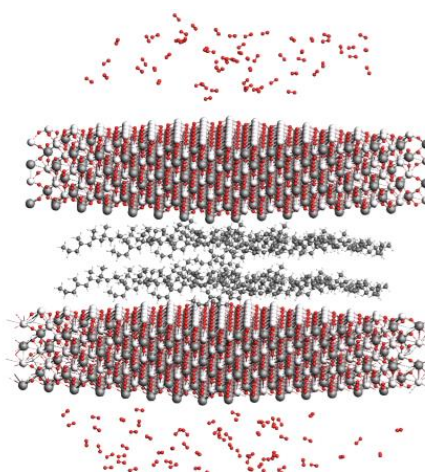

PP=10 (40%)

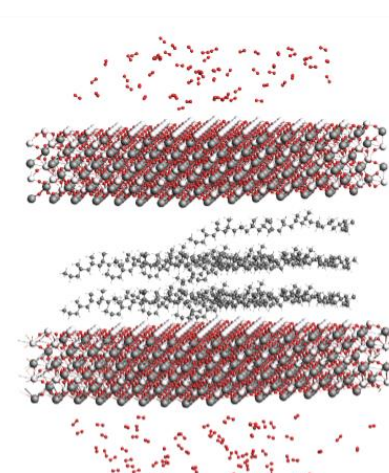

PP=11 (44%)

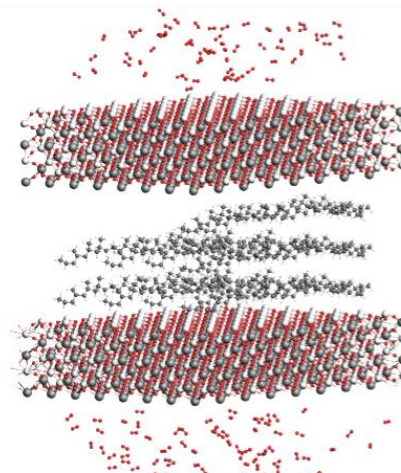

PP=12 (48%)

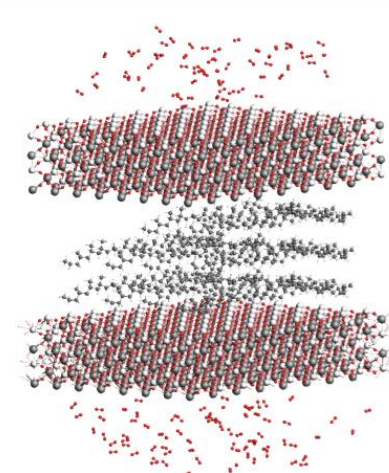

PP=13 (52%)

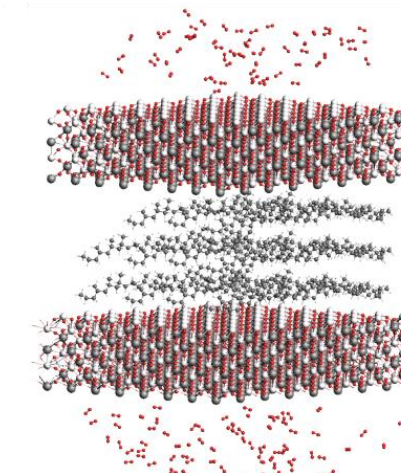

PP=14 (56%)

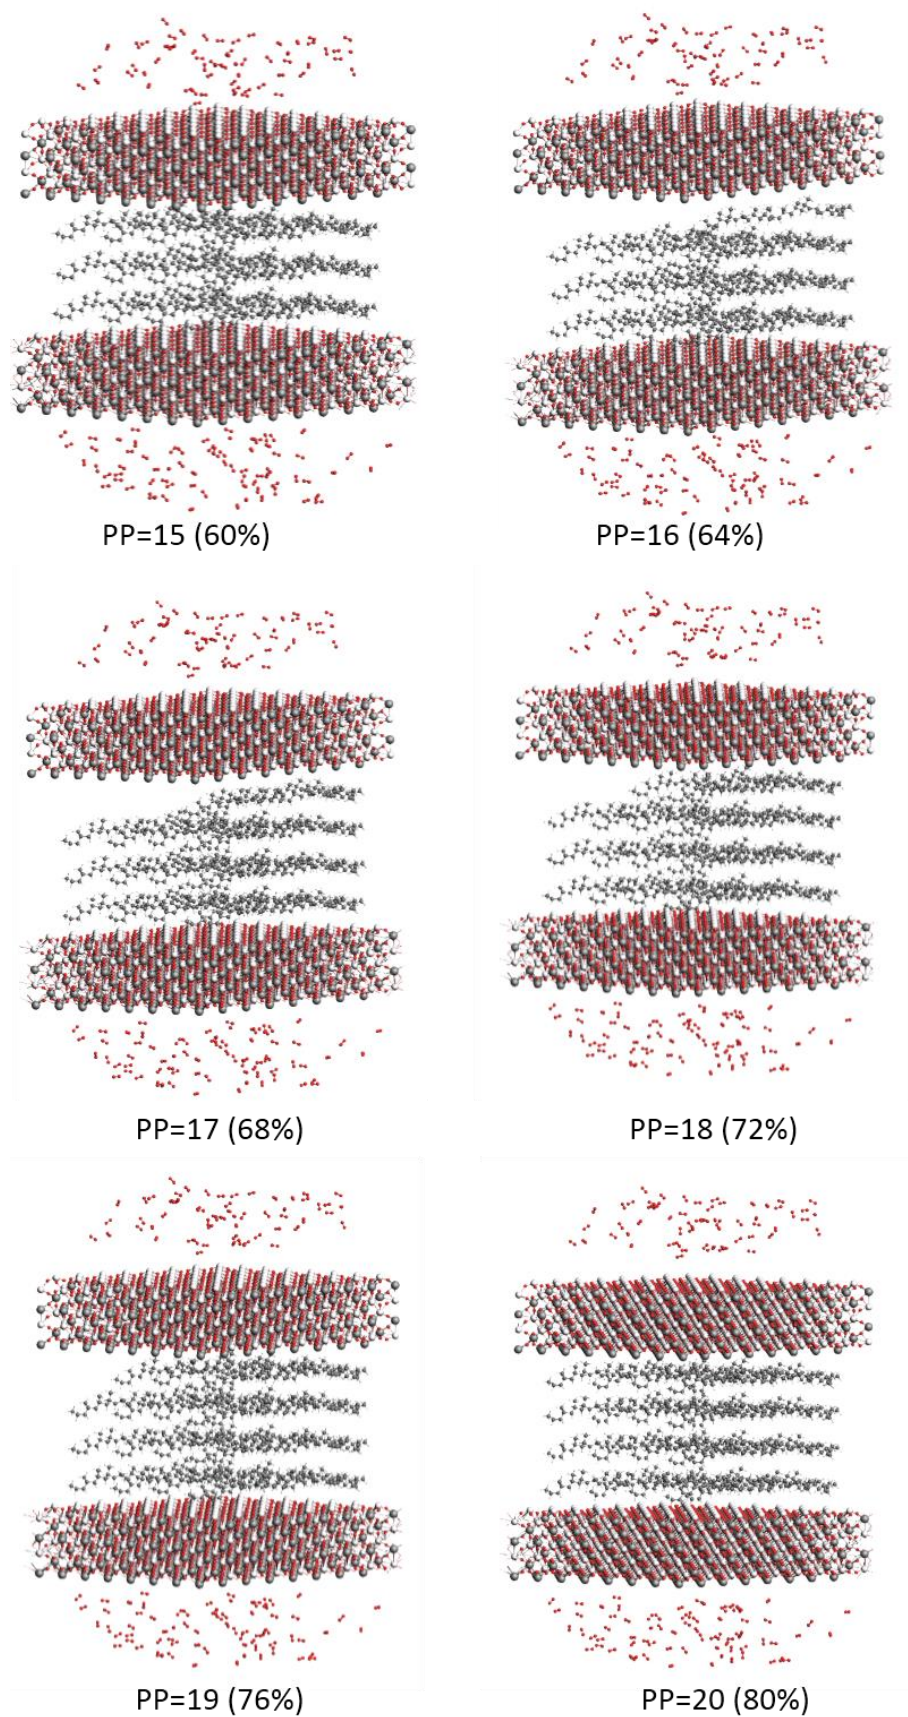

**Figure S1.** Models of 20 different ZS/PP composites with various ratios for combustions.
